# Supplementary material for: Correlation between the topologically close-packed structure and the deformation behavior of metallic Cu64.5Zr35.5
Source: Royal Society of Chemistry journal article supplement (doi:10.1039/d1cp03758g), 2021-01-01
Supplement: d1cp03758g1.pdf [file d1cp03758g1.pdf]

Supplementary Materials for  
**Correlation between the topologically close-packed structure and the deformation  
behavior of metallic  $\text{Cu}_{64.5}\text{Zr}_{35.5}$**

\*Corresponding author. Email: [tianzean@hnu.edu.cn](mailto:tianzean@hnu.edu.cn)

This PDF file includes:  
Figs. sFig.1 to sFig.8

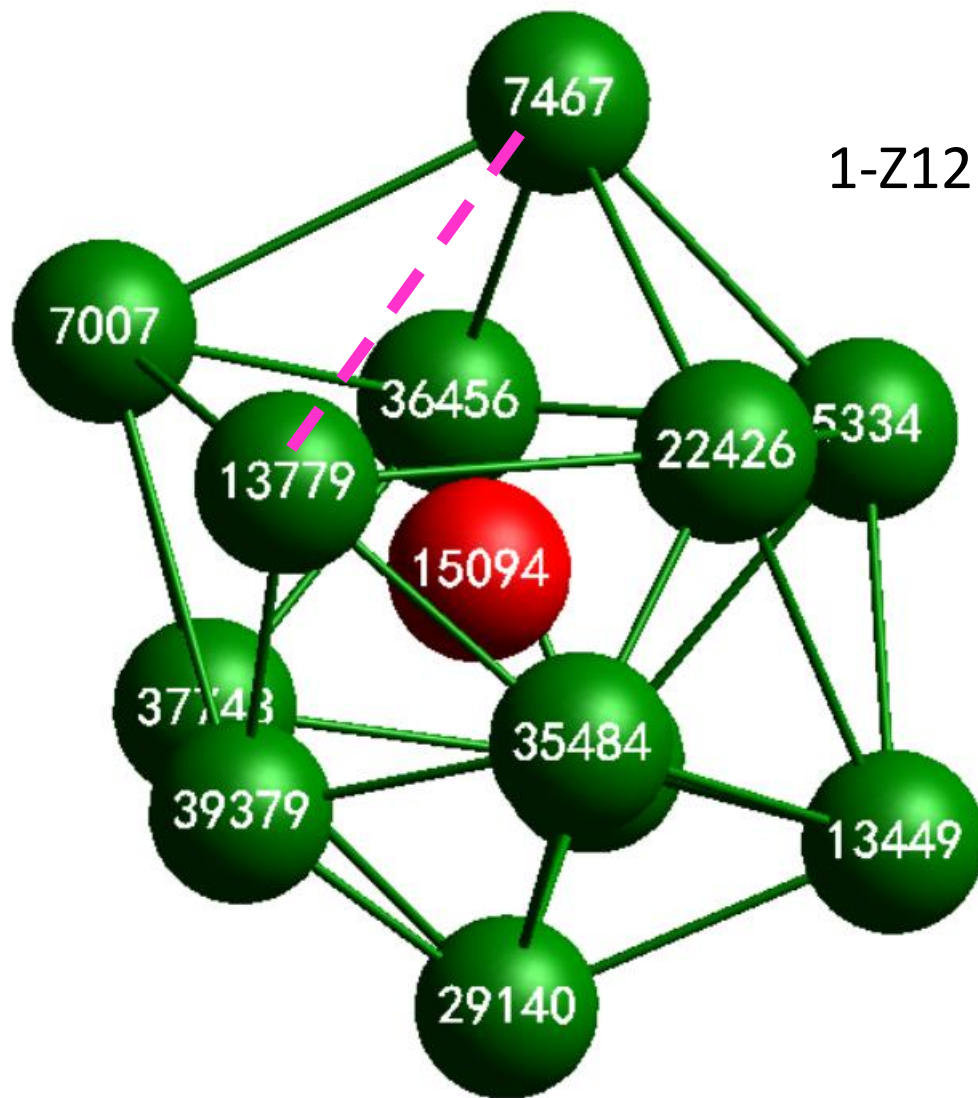

7467: S433 → S555  
 13779: S433 → S555  
 22426: S544 → S555  
 7007: S544 → S555

sFig.1 [2/433 2/544 8/555] → [12/555]

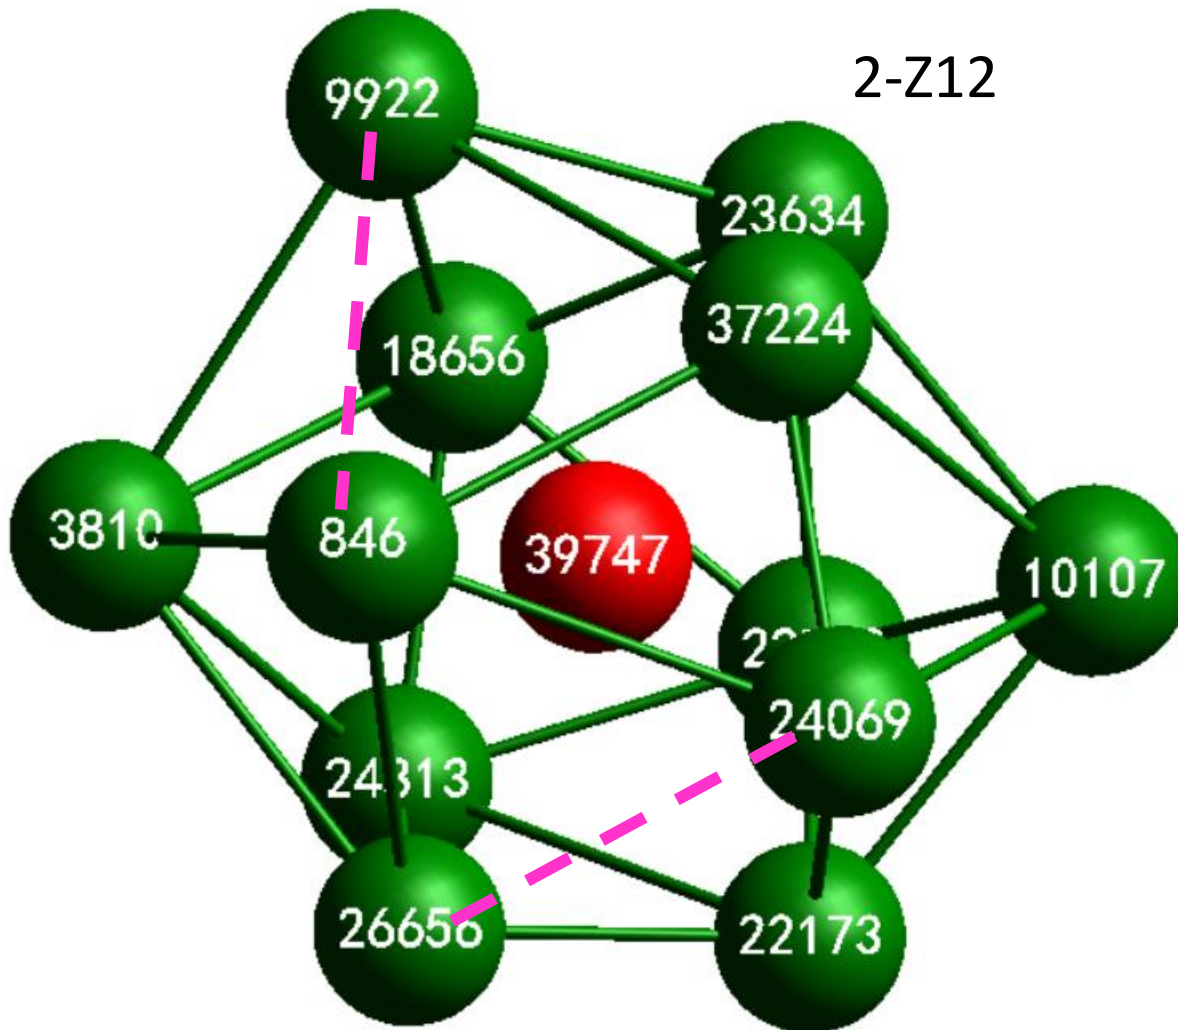

- 846: S421 → S555
- 9922: S433 → S555
- 26656: S433 → S555
- 24069: S433 → S555
- 37224: S544 → S555
- 22173: S544 → S555
- 3810: S544 → S555

sFig.2 [1/421 3/433 3/544 5/555] → [12/555]

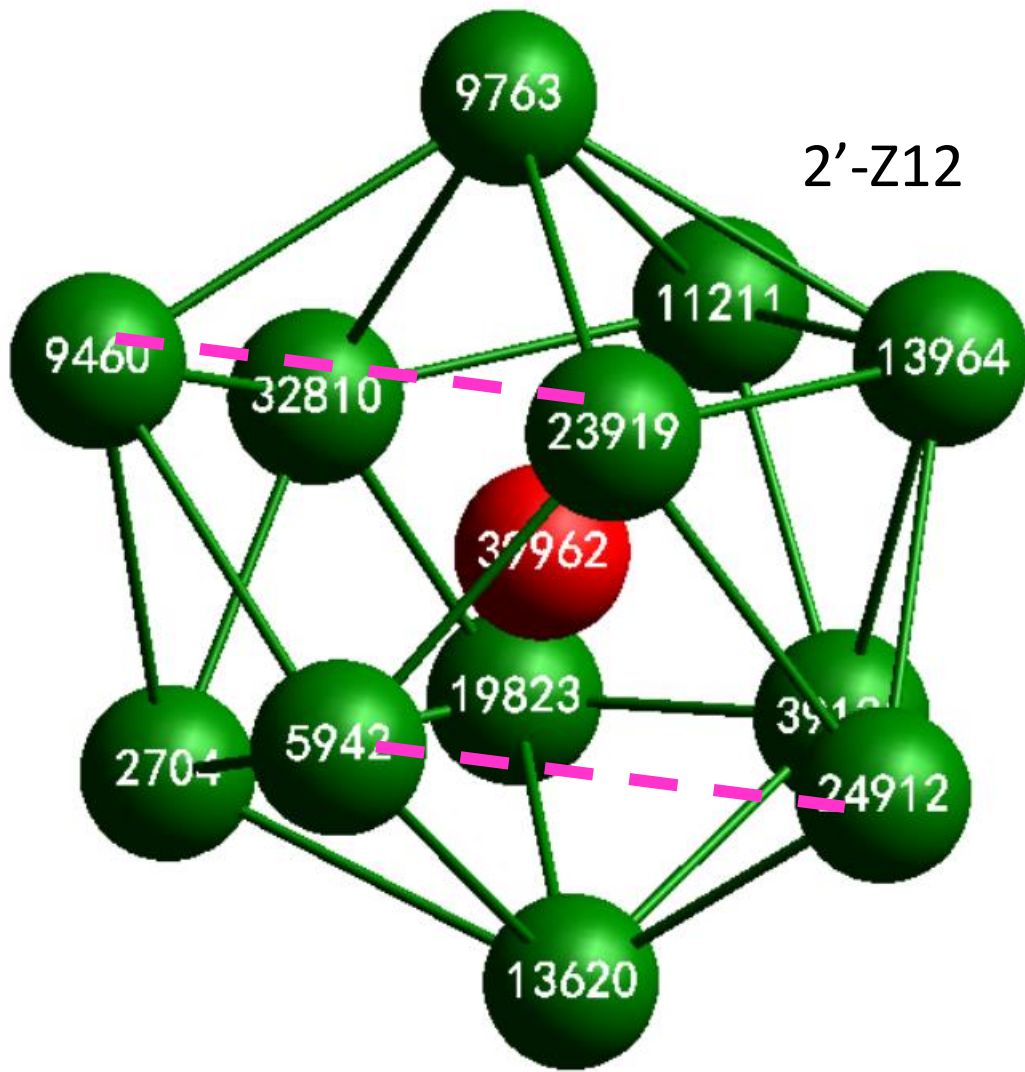

23919: S422  $\rightarrow$  S555  
 5942: S422  $\rightarrow$  S555  
 9460: S433  $\rightarrow$  S555  
 24912: S433  $\rightarrow$  S555  
 13620: S544  $\rightarrow$  S555  
 9763: S544  $\rightarrow$  S555

sFig.3 [2/422 2/433 2/544 6/555]  $\rightarrow$  [12/555]

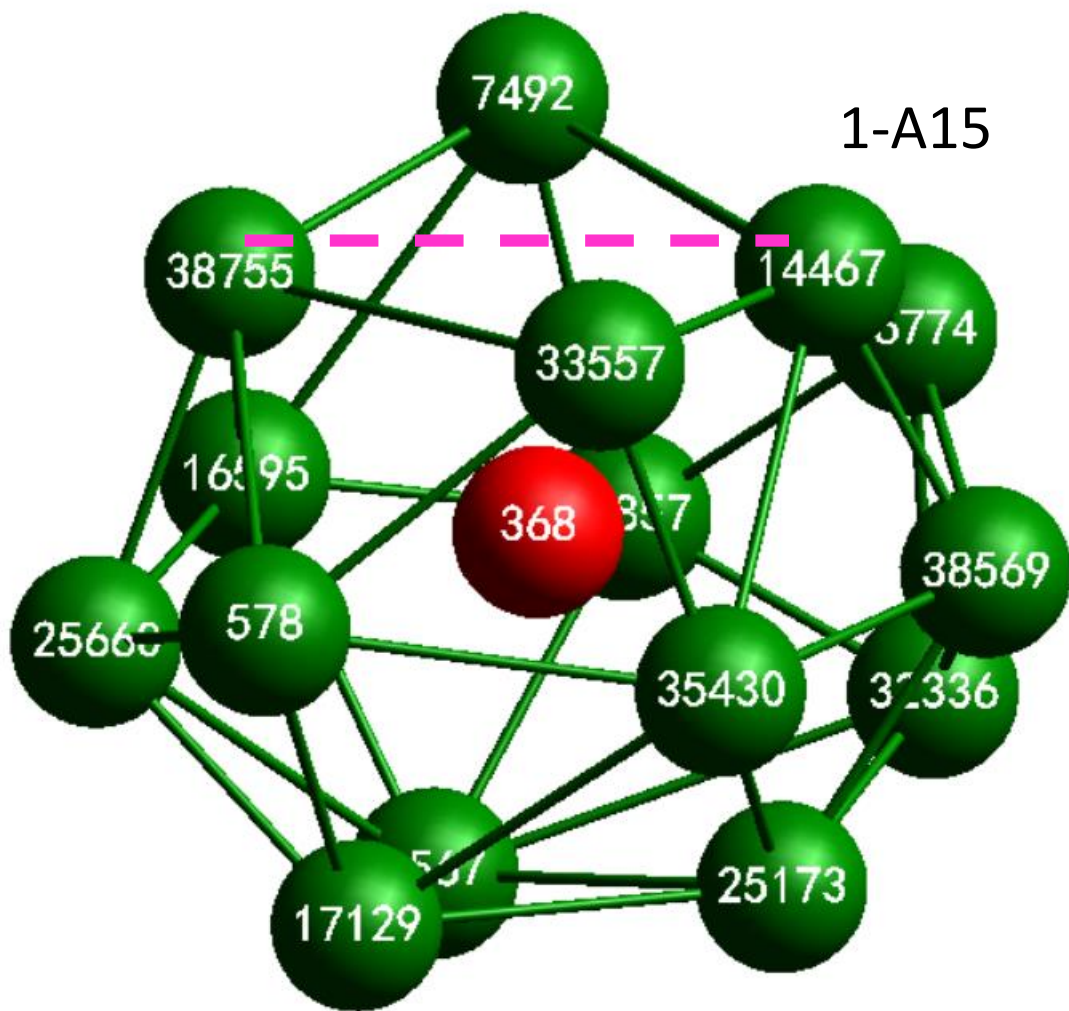

7492: S433  $\rightarrow$  S444  
 38755: S544  $\rightarrow$  S555  
 14467: S544  $\rightarrow$  S555  
 33557: S544  $\rightarrow$  S555

sFig.4 [1/433 3/544 9/555 2/666]  $\rightarrow$  [1/444 12/555 2/666]



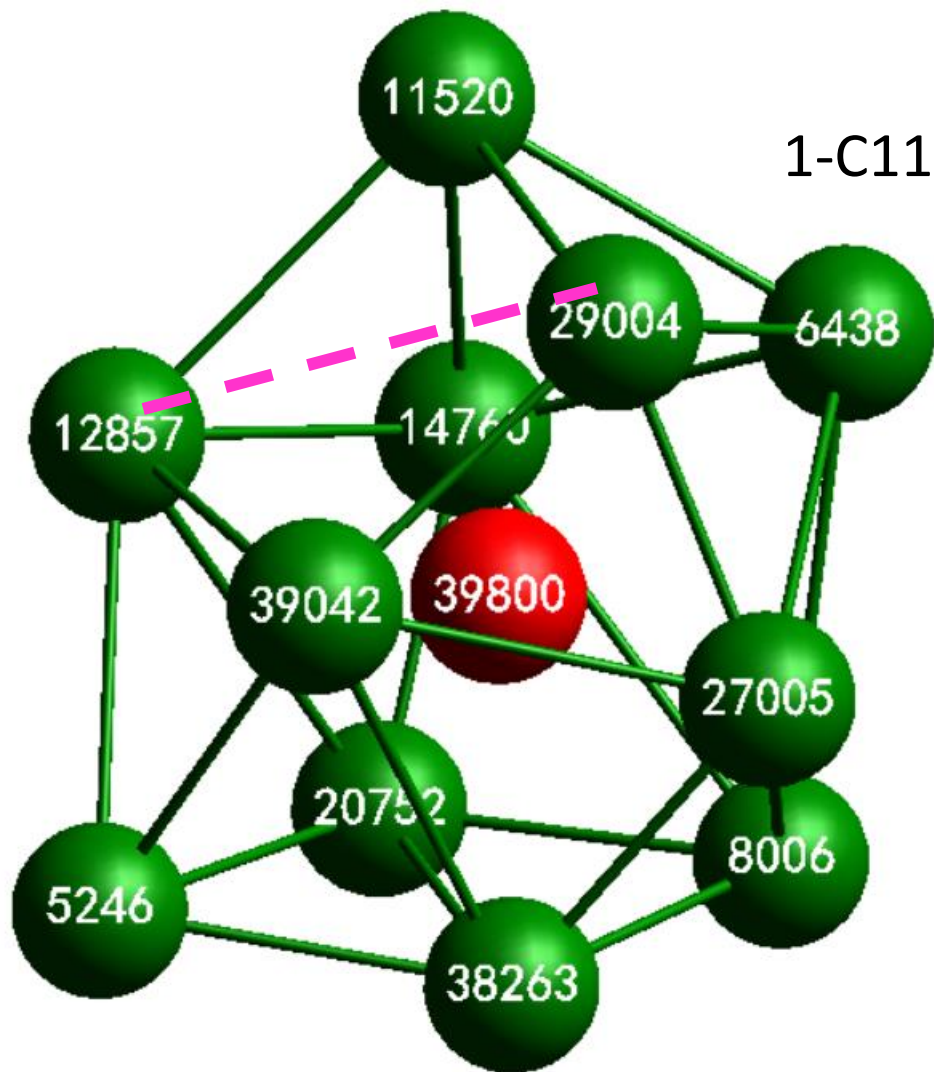

29004: S433  $\rightarrow$  S444  
 11520: S433  $\rightarrow$  S444  
 12857: S544  $\rightarrow$  S555  
 39042: S544  $\rightarrow$  S555

sFig.5 [2/433 1/444 2/544 6/555]  $\rightarrow$  [3/444 8/555]

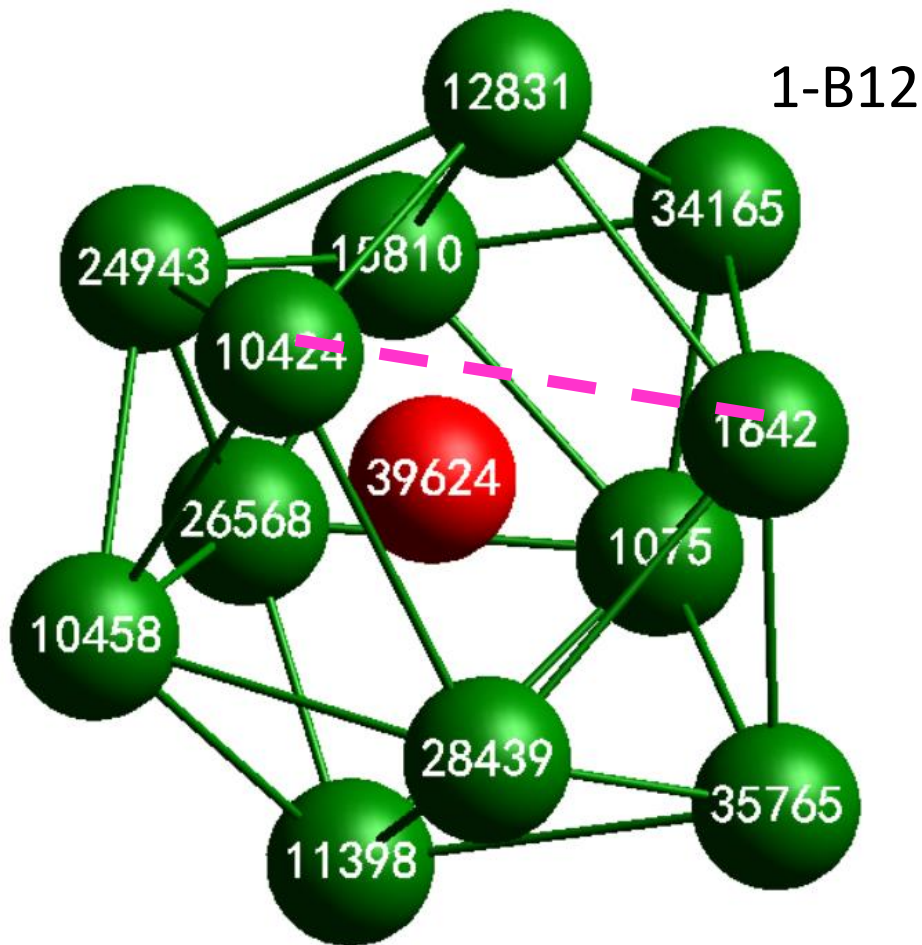

10424: S433  $\rightarrow$  S555  
 12831: S544  $\rightarrow$  S555  
 1642: S544  $\rightarrow$  S666  
 28439: S544  $\rightarrow$  S555

sFig.6 [1/433 2/444 3/544 5/555 1/666]  $\rightarrow$  [2/444 8/555 2/666]

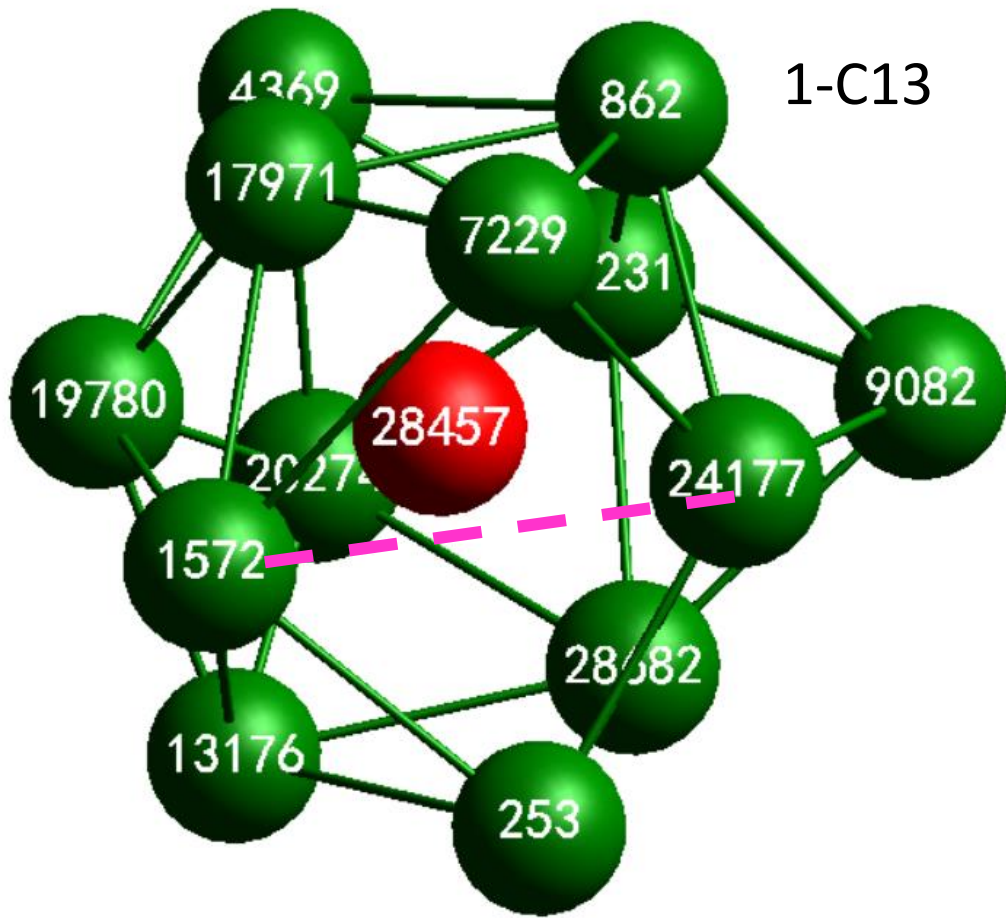

1572: S544 → S666  
 7229: S433 → S444  
 24177: S544 → S666  
 253: S433 → S444

sFig.7 [2/433 1/444 2/544 6/555 2/666] → [3/444 6/555 4/666]



1-C12

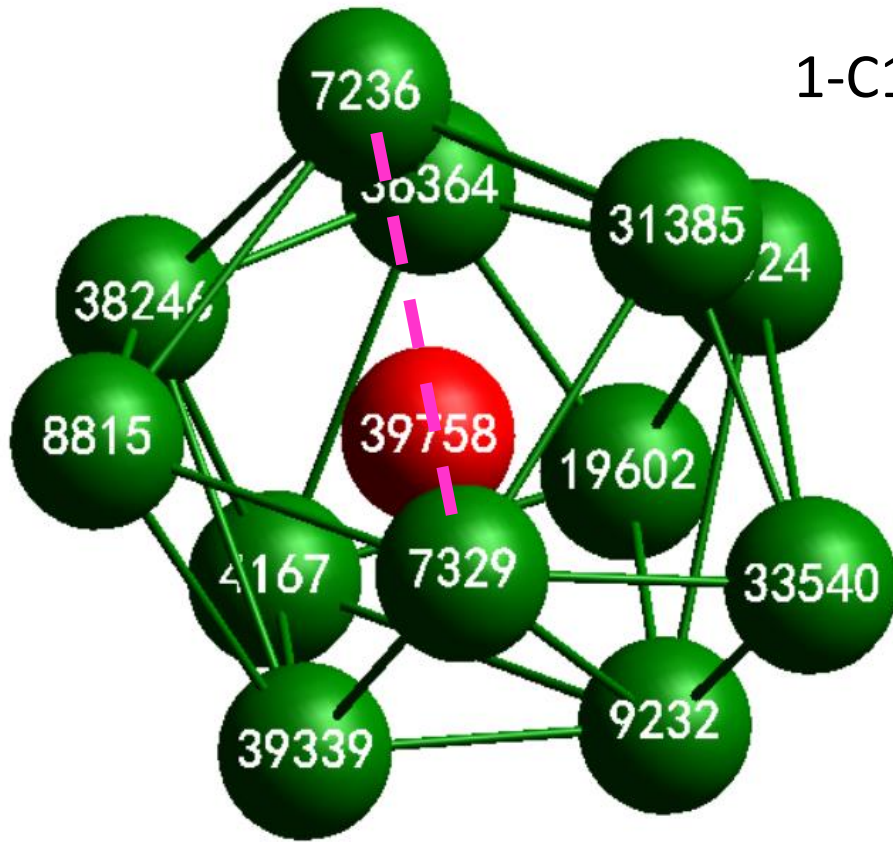

- 7236: S433 → S555
- 8815: S433 → S444
- 7329: S544 → S666
- 31385: S544 → S555

sFig.8 [2/433 2/444 2/544 4/555 2/666] → [3/444 6/555 3/666]
